Multiple imputation of missing data under missing at random: including a collider as an auxiliary variable in the imputation model can induce bias

Elinor Curnow<sup>\*1,2</sup>, Kate Tilling<sup>1,2</sup>, Jon E Heron<sup>1,2</sup>, Rosie P Cornish<sup>1,2</sup>, James R Carpenter<sup>3,4</sup>

<sup>1</sup> Department of Population Health Sciences, Bristol Medical School, University of Bristol, Bristol, UK

<sup>2</sup> Medical Research Council Integrative Epidemiology Unit at the University of Bristol, University of Bristol, Bristol, UK

<sup>3</sup> Department of Medical Statistics, London School of Hygiene and Tropical Medicine, University of London, London, UK

<sup>4</sup> Medical Research Council Clinical Trials Unit at University College London, University of London, London, UK

**\*Corresponding author:** Elinor Curnow, Population Health Sciences, Bristol Medical School, University of Bristol, Oakfield House, Oakfield Grove, Bristol BS8 2BN, UK  
Telephone: +44 117 455 6622  
Email: [elinor.curnow@bristol.ac.uk](mailto:elinor.curnow@bristol.ac.uk), ORCID iD: 0000-0002-3109-3647

**Running head:** Collider auxiliary variables can induce bias

## Keywords

missing data; multiple imputation; collider bias; auxiliary variable; ALSPAC

## Sources of Funding

The results reported herein correspond to specific aims of grant MR/V020641/1 to investigators Kate Tilling and James Carpenter from the UK Medical Research Council. Elinor Curnow, Jon Heron, Rosie Cornish, and Kate Tilling work in the Medical Research Council Integrative Epidemiology Unit at the University of Bristol which is supported by the UK Medical Research Council and the University of Bristol MC\_UU\_00032/02. James Carpenter is also supported by the UK Medical Research Council (grant no MC\_UU\_00004/04). The UK Medical Research Council and the Wellcome Trust (grant no 217065/Z/19/Z), and the University of Bristol currently provide core funding for ALSPAC. Data collection is funded from a wide range of sources.

## Acknowledgements

We are extremely grateful to all the families who took part in the ALSPAC study, the midwives for their help in recruiting them, and the whole ALSPAC team, which includes interviewers, computer and laboratory technicians, clerical workers, research scientists, volunteers, managers, receptionists and nurses.

## Competing Interests

The authors have no relevant financial or non-financial interests to disclose.

## Author Contributions

All authors contributed to the study conception and design. Analysis of the simulation study and real dataset were performed by Elinor Curnow. The first draft of the manuscript was written by Elinor Curnow and all authors commented on previous versions of the manuscript. All authors read and approved the final manuscript.

## Data and computing code availability

Stata code to verify theoretical results, and also to generate and analyse the data as per the simulation studies is included in Supplementary Material, Section S8. Stata code to analyse the real data example is included in Supplementary Material, Section S9. The real data are not publicly available due to privacy restrictions.

NOTE: This preprint reports new research that has not been certified by peer review and should not be used to guide clinical practice.

## **Abstract**

Epidemiological studies often have missing data, which are commonly handled by multiple imputation (MI). In MI, in addition to those required for the substantive analysis, imputation models often include other variables (“auxiliary variables”). Auxiliary variables that predict the partially observed variables can reduce the standard error (SE) of the MI estimator and, if they also predict the probability that data are missing, reduce bias due to data being missing not at random. However, guidance for choosing auxiliary variables is lacking. We examine the consequences of a poorly-chosen auxiliary variable: if it shares a common cause with the partially observed variable *and* the probability that it is missing (*i.e.* it is a “collider”), its inclusion can induce bias in the MI estimator and may increase SE. We quantify, both algebraically and by simulation, the magnitude of bias and SE when either the exposure or outcome are incomplete. When the substantive analysis outcome is partially observed, the bias can be substantial, relative to the magnitude of the exposure coefficient. In settings in which complete records analysis is valid, the bias is smaller when the exposure is partially observed. However, bias can be larger if the outcome also causes missingness in the exposure. When using MI, it is important to examine, through a combination of data exploration and considering plausible casual diagrams and missingness mechanisms, whether potential auxiliary variables are colliders.

## **Contribution to the field statement**

In multiple imputation (MI), in addition to those required for the substantive analysis, imputation models often include other variables (“auxiliary variables”). Auxiliary variables that predict the partially observed variables can reduce the standard error (SE) of the MI estimator and, if they also predict the probability that data are missing, reduce bias due to data being missing not at random. We examine the consequences of a poorly-chosen auxiliary variable: if it shares a common cause with the partially observed variable *and* the probability that it is missing (*i.e.* it is a “collider”), its inclusion can induce bias in the MI estimator and may increase SE. We demonstrate that when the substantive analysis outcome is partially observed, the bias can be substantial, relative to the magnitude of the exposure coefficient. In settings in which complete records analysis is valid, the bias is smaller when the exposure is partially observed. However, bias can be larger if the outcome also causes missingness in the exposure. We recommend a combination of data exploration and consideration of plausible casual diagrams and missingness mechanisms to examine whether potential auxiliary variables are colliders.

## 1 Main Article

### 2 1. Introduction

3 Missing data are ubiquitous in health and social research, with multiple imputation (MI) the  
4 most flexible, general, and commonly used method for analysing partially observed datasets  
5 (1). When imputation models are appropriately specified, MI gives valid inferences if data are  
6 missing completely at random (MCAR) or missing at random (MAR), conditional on the  
7 observed data, but not (unless additional information is available) if data are missing not at  
8 random (MNAR) (Table 1). In MI, in addition to the variables used in the analysis model,  
9 imputation models often include auxiliary variables (Table 1). Auxiliary variables have two  
10 main functions: (i) to improve the predictive ability of the imputation model, over and above  
11 the information recovered via the analysis model variables, thus increasing precision (2), and  
12 (ii) to reduce bias due to data being MNAR (this is sometimes described as “making the  
13 MAR assumption more plausible”) (3). However, previous studies have shown that inclusion  
14 of auxiliary variables that are only weakly correlated with the partially observed variable,  
15 conditional on the remaining imputation model variables, can increase the standard error  
16 (SE) of the MI estimate (2, 4). In this paper, we highlight another, little known, consequence  
17 of incorrect choice of auxiliary variable: inclusion of an auxiliary variable that shares a  
18 common cause with the partially observed variable *and* its missingness (in causal inference,  
19 such a variable is referred to as a “collider” (5)) can lead to biased MI estimates by inducing  
20 a MNAR mechanism. We also demonstrate that inclusion of a collider in the imputation  
21 model may also increase SE, despite the collider being (conditionally) predictive of the  
22 missing data. The consequences of including a collider in the imputation model was  
23 discussed in principle by Thoemmes and Rose (6). Here, we quantify the bias and SE of the  
24 MI estimator based on a collider. We expand the scenarios discussed by Thoemmes and  
25 Rose, considering settings in which the (continuous or binary) partially observed variable is  
26 either the analysis model outcome or the exposure. We further illustrate our results using  
27 simulation and real data examples. All analyses were conducted using Stata (17.0,  
28 StataCorp LLC, College Station, TX). Stata code to perform the simulation studies is  
29 included in Supplementary Material, Section S8. Stata code to perform the real data analysis  
30 is included in Supplementary Material, Section S9.

31

### 32 2. Bias and SE of the MI estimator including a collider in the imputation model 33 when a continuous outcome is partially observed

#### 34 2.1. Methods

35 We first consider the setting as shown in the causal diagram (or directed acyclic graph,  
36 DAG) in Figure 1. This simplified setting is chosen to give insights into the more complex  
37 settings that typically occur in epidemiological practice. We are interested in the relationship  
38 between continuous outcome ( $Y$ ) and continuous exposure ( $X$ ), with  $\beta_{YX}$  denoting the  
39 parameter of interest. Here, we assume that  $X$  is fully observed and  $Y$  is partially observed,  
40 with variable  $R_{ind}$  denoting the missingness indicator for  $Y$  ( $R_{ind} = 1$  if  $Y$  is observed, and 0  
41 otherwise). We assume that we know (having considered the DAG) the 'substantive model'  
42 we would fit to address our scientific question if there were no missing data. In this case, this  
43 is simply the regression of  $Y$  on  $X$ , because the other variables depicted in the DAG,  $\{Z, W,$   
44  $U\}$ , do not confound the  $X$ - $Y$  relationship. We assume that  $Z$  and  $W$  are fully observed, and  
45  $U$  denotes unmeasured variable(s).

46

47 Since  $R_{ind}$  is unrelated to  $Y$  conditional on  $X$ , both CRA, and MI using  $X$  as the predictor in  
48 the imputation model for  $Y$ , are valid analysis strategies (7) and will yield unbiased estimates  
49 given correctly specified models. However, MI using just  $X$  will recover no additional  
50 information compared to CRA (8). Therefore, we may wish to include auxiliary variables in  
51 our imputation model (*i.e.* either  $Z$ , or  $W$ , or both) to improve the precision of our estimate of  
52  $\beta_{YX}$ .

53

54 For example, consider a longitudinal cohort study where we are interested in the relationship  
55 between child's body mass index (BMI) at age 7 years (our outcome  $Y$ ) and maternal

1 education (our exposure  $X$ ). In this study, suppose that BMI at age 7 years is partially  
2 observed, maternal education is fully observed, and that there are only two fully observed  
3 candidate auxiliary variables available for use in the imputation model for BMI at age 7  
4 years: pregnancy size (singleton vs. twin birth),  $Z$ , and child's birth weight,  $W$ , (although we  
5 note that in reality there will be many other measured and unmeasured variables related to  
6 those discussed here e.g. markers of socio-economic position). We want to choose the most  
7 appropriate set of predictors to include in the imputation model for BMI at age 7 years,  
8 choosing between: (i) maternal education, (ii) maternal education and pregnancy size, (iii)  
9 maternal education and birth weight, or (iv) maternal education, pregnancy size, and birth  
10 weight.

11  
12 We assume pregnancy size is a cause of birth weight and BMI at age 7 years, but is  
13 unrelated to the missingness of BMI at age 7 years (*i.e.* pregnancy size is related to the  
14 other variables as depicted for  $Z$  in Figure 1). If we further assume that birth weight is related  
15 to missingness via some unmeasured variable(s) but is not a cause of BMI at age 7 years  
16 (*i.e.* birth weight is related to the other variables as depicted for  $W$  in Figure 1), then birth  
17 weight shares a common cause with both BMI at age 7 years and its missingness. In other  
18 words, birth weight is a collider of BMI at age 7 years and its missingness. In this case,  
19 including birth weight but not pregnancy size in the imputation model for BMI at age 7 years  
20 will induce bias in the MI estimate (in causal inference, this type of bias is often referred to  
21 as “M-bias” (9), due to the “M” shape of the causal pathways, as shown in Figure 1).  
22

23 For the setting depicted in Figure 1, we provide general formulas for quantifying the bias and  
24 SE of the MI estimator when using  $X$  and  $W$ , but not  $Z$ , as predictors in the imputation model  
25 for  $Y$ . A full proof is included in the Supplementary Material (Section S2). The main  
26 arguments and results are described below.  
27

## 28 2.2. Results

### 29 2.2.1. Bias in the MI estimator when including a collider in the imputation model

30 We assume that  $Y$ ,  $X$ ,  $Z$ ,  $U$ , and  $W$  are normally distributed, and  $R_{ind}$  is defined as follows:  
31 there exists a normally distributed variable  $R$  with mean  $\mu_R$  and variance  $V_R$  such that  $P(R_{ind}$

32  $= 1) = P(R \leq r) = \Phi\left(\frac{r - \mu_R}{\sqrt{V_R}}\right)$ , where  $\Phi$  denotes the cumulative distribution function of the

33 standard normal distribution. Furthermore, we assume that each of  $Y$ ,  $W$ , and  $R$  is a linear  
34 combination of the variables causing it plus an error term (with  $X$ ,  $Z$ , and  $U$  having no direct  
35 causes), with no interactions, all errors uncorrelated, no model mis-specification, and no  
36 measurement error. Finally, we assume an ordinary least squares (OLS) estimator is used to  
37 obtain estimates in both analysis and imputation models.  
38

39 We consider the situation in which MI is performed by replacing missing values of  $Y$  with  
40 draws from a linear regression model (note this is the default method for continuous  
41 variables when using *mi impute* in Stata (10) or *proc mi* in SAS (11), although predictive  
42 mean matching (12) is the default method when using *mice* in R (13)). As described above,  
43 we assume both  $X$  and  $W$  are included as predictors in the imputation model for  $Y$ , *i.e.* the  
44 imputation model is of the form:  $E(Y) = \alpha_0 + \alpha_1 X + \alpha_2 W$ , where  $E(\cdot)$  denotes the expected  
45 value. Following the argument of Carpenter and Kenward (4) and noting, implicit from Figure  
46 1, that  $\beta_{YX}$  conditional on  $W$  ( $\beta_{YX|W}$ ) is equivalent to  $\beta_{YX}$  in our scenario, the MI estimator of  
47  $\beta_{YX}$  (denoted by  $\beta_{YX}^{MI}$ ) equals the regression parameter for  $X$  from the imputation model for  $Y$   
48 based on records with observed values of  $Y$  (we denote this parameter by  $\alpha_1^{OBS}$ ). Hence, the  
49 MI estimator is unbiased only if  $\alpha_1^{OBS}$  is unbiased.  
50

51 In general (see Supplementary Material Section S1 for further explanation of this result), the  
52 bias of the MI estimator is bounded as follows:  $0 \leq \text{bias} \leq |\beta_{YX|W,R} - \beta_{YX}|$ . If there are no  
53 missing values of  $Y$ , the MI estimator is unbiased. As the probability that  $Y$  is missing (*i.e.*

1  $P(R_{ind} = 0)$ , denoted by  $\pi_0$ ) increases, the magnitude of bias of the MI estimator increases. In  
 2 the hypothetical situation in which all values are missing, bias takes its maximum value of  
 3  $|\beta_{YX|W,R} - \beta_{YX}|$ .

4  
 5 **2.2.2. Standard error of the MI estimator when including a collider in the imputation**  
 6 **model**

7 The SE of the MI estimator when including collider  $W$  in the imputation model,  $SE(\beta_{YX}^{MI})$ , will  
 8 always be greater than the SE of the imputation model coefficient  $\alpha_1^{OBS}$ ,  $SE(\alpha_1^{OBS})$ , with  $\alpha_1^{OBS}$   
 9 as defined above, tending towards  $SE(\alpha_1^{OBS})$  as the number of imputations increases (4).  
 10 Hence, given a large number of imputations,  $SE(\beta_{YX}^{MI}) \approx SE(\beta_{YX|W})$  when  $\pi_0 = 0$  and  $SE(\beta_{YX}^{MI})$   
 11  $\rightarrow SE(\beta_{YX|W,R})$  as  $\pi_0 \rightarrow 1$  (see Supplementary Material Section S1 for further explanation of  
 12 this result).

13  
 14 In general, the SE of the OLS estimator of a regression coefficient,  $SE(\beta)$ , equals the square  
 15 root of the residual variance divided by the square root of the product of the sample size ( $n$ )  
 16 and the variance of  $X$  for the fitted model. Hence, we can calculate  $SE(\beta_{YX|W})$  and

17  $SE(\beta_{YX|W,R})$  as follows:  $SE(\beta_{YX|W}) = \sqrt{\frac{\text{Var}(Y - \hat{Y}|X,W)}{n\text{Var}(X|W)}}$  and  $SE(\beta_{YX|W,R}) = \sqrt{\frac{\text{Var}(Y - \hat{Y}|X,W,R)}{n\text{Var}(X|W,R)}}$ , where in  
 18 this setting,  $n$  represents the number of records with an observed value of  $Y$ , and  $\hat{Y}$   
 19 represents the mean value of  $Y$  predicted using the specified imputation model.

20  
 21 Since  $\text{Cov}(X,W) = 0$  and  $\text{Var}(X|W) = \text{Var}(X)$  (see Supplementary Material Section S2 for  
 22 proof of this and other expressions in this section),  $SE(\beta_{YX|W})$  can be expressed fairly simply  
 23 as:

24 
$$\sqrt{\frac{\text{Var}(Y) - \beta_{YX}^2 \text{Var}(X) - \text{Cov}^2(Y,W)/\text{Var}(W)}{n\text{Var}(X)}} \quad (2.2.1)$$

25  
 26 The expression for  $SE(\beta_{YX|W,R})$  is more complicated; if the imputation model parameters for  
 27  $X$ ,  $W$ , and  $R$  are denoted by  $b_1$ ,  $b_2$ , and  $b_3$ , respectively,  $SE(\beta_{YX|W,R})$  has the general form:

28 
$$\sqrt{\frac{\text{Var}(Y) - b_1^2 \text{Var}(X|W,R) - b_2^2 \text{Var}(W|X,R) - b_3^2 \text{Var}(R|X,W) - 2b_1b_2 \text{Cov}(X,W|R) - 2b_1b_3 \text{Cov}(X,R|W) - 2b_2b_3 \text{Cov}(W,R|X)}{n\text{Var}(X|W,R)}} \quad (2.2.2)$$

29  
 30 The size of this expression, relative to the magnitude of Formula 2.2.1, will depend on the  
 31 strength of the associations between  $Y$ ,  $X$ ,  $Z$ ,  $W$ ,  $U$ , and  $R$ . Since  $\text{Var}(X|W,R) \leq \text{Var}(X)$ , if the  
 32 residual variance (*i.e.* the numerator in Formula 2.2.2) is at least as large as that for  
 33  $SE(\beta_{YX|W})$  (*i.e.* the numerator in Formula 2.2.1),  $SE(\beta_{YX|W,R})$  will be greater than  $SE(\beta_{YX|W})$   
 34 given the same sample size  $n$ .

35  
 36 Further note that the SE of the CRA estimator is equal to  $SE(\beta_{YX}) = \sqrt{\frac{\text{Var}(Y) - \beta_{YX}^2 \text{Var}(X)}{n\text{Var}(X)}} \quad (2.2.3)$

37 when  $\pi_0 = 0$ ,

38 tending to  $SE(\beta_{YX|R}) = \sqrt{\frac{\text{Var}(Y - \hat{Y}|X,R)}{n\text{Var}(X|R)}} = \sqrt{\frac{\text{Var}(Y) - \beta_{YX}^2 \text{Var}(X)}{n\{\text{Var}(X) - \text{Cov}^2(X,R)/\text{Var}(R)\}}}$  (2.2.4)

39 as  $\pi_0 \rightarrow 1$  (noting  $Y$  is unrelated to  $R$  given  $X$  so  $\hat{Y}|X,R = \beta_{YX}X$ ). Note this is also, given a  
 40 large number of imputations, approximately the SE of the MI estimator when only  $X$  is  
 41 included in the imputation model. Comparing Formulas 2.2.3 and 2.2.4, we see, as  
 42 expected, that SE of the CRA estimator increases as  $\pi_0 \rightarrow 1$ . Furthermore, comparing  
 43 Formulas 2.2.3 and 2.2.4 with Formulas 2.2.1 and 2.2.2, the SE of the CRA estimator, or the  
 44 MI estimator using only  $X$ , may be greater in magnitude than SE of the MI estimator  
 45 including  $W$  in the imputation model, depending on the strength of the associations between  
 46  $Y$ ,  $X$ ,  $Z$ ,  $W$ ,  $U$ ,  $R$ , and  $\pi_0$  (although the SE of the CRA estimator, or the MI estimator using

1 only  $X$ , will always be greater than the SE of the MI estimator including  $W$  in the imputation  
 2 model when  $\pi_0 = 0$ , given  $\text{Cov}(Y, W) \neq 0$ .

3

4 **2.2.3. Illustration of the bias and standard error of the MI estimator when including a  
 5 collider in the imputation model as the proportion of missing data increases**

6 We illustrate how the bias and SE of the MI estimator when including a collider in the  
 7 imputation model vary with  $\pi_0$ , using a simple simulation (see Supplementary Material  
 8 Section S3 for further details). For reference, we also illustrate how the SE of the CRA  
 9 estimator varies with  $\pi_0$  (the CRA estimator is always unbiased in this setting). This example  
 10 is based on the relationships depicted in Figure 1, setting the mean of each variable equal to  
 11 zero, all direct effect sizes equal to one, and all error variances equal to one.

12

13 Figure 2 shows, as  $\pi_0$  increases, (a) estimated bias and (b) estimates of SE of the MI  
 14 estimator when the imputation model includes a collider, compared with SE of the CRA  
 15 estimator. For reference, the true values of  $\beta_{YX}$ ,  $\beta_{YX|W,R}$ ,  $\text{SE}(\beta_{YX|W})$ ,  $\text{SE}(\beta_{YX|W,R})$ ,  $\text{SE}(\beta_{YX})$ ,  
 16 and  $\text{SE}(\beta_{YX|R})$  are shown (with the residual variance of  $\text{SE}(\beta_{YX|W,R})$  calculated empirically  
 17 due to the complexity of the algebraic form for this quantity). As expected, when there were  
 18 no missing values, bias of the MI estimator equalled zero, SE of the MI estimator was equal  
 19 to  $\text{SE}(\beta_{YX|W})$ , and SE of the CRA estimator was equal to  $\text{SE}(\beta_{YX})$ . As  $\pi_0$  increased, bias, SE  
 20 of the MI estimator, and SE of the CRA estimator increased at a similar, approximately linear  
 21 rate (until  $\pi_0$  was very close to 1), approaching  $|\beta_{YX|W,R} - \beta_{YX}|$ ,  $\text{SE}(\beta_{YX|W,R})$ , and  $\text{SE}(\beta_{YX|R})$ ,  
 22 respectively, as  $\pi_0$  approached 1. Bias was approximately half the maximum value when  $\pi_0$   
 23 = 0.5. In this particular example, for each value of  $\pi_0$ , the SE of the MI estimator was smaller  
 24 than the SE of the CRA estimator. However, note that this will not always be the case e.g. if  
 25 the strength of the associations between both  $Y$  and  $Z$ , and  $W$  and  $Z$  are reduced to 0.5 (with  
 26 the setting otherwise as depicted in Figure 2), SE of the MI estimator will be greater than SE  
 27 of the CRA estimator if the proportion of missing data is greater than approximately 40%  
 28 (see Supplementary Material Section S1, Figure S1 and also Section S5, Figure S2 which  
 29 illustrates the relative precision of the MI and CRA estimators for various direct effect sizes).  
 30 The difference between  $\hat{\beta}_{YX}^{MI}$  and  $\hat{\alpha}_1^{OBS}$  was negligible (the median difference was 0.0001, 5<sup>th</sup>  
 31 – 95<sup>th</sup> percentile: -0.0003 – 0.0001).

32

33 **2.2.4. General expression for the maximum bias of the MI estimator when including a  
 34 collider in the imputation model**

35 In terms of the direct effect sizes and error variances, the maximum bias of the MI estimator  
 36 when including a collider in the imputation model is:

37 
$$\beta_{YX|W,R} - \beta_{YX} = \frac{\beta_{RX}\beta_{RU}\beta_{WU}\beta_{YZ}\beta_{WZ}\sigma_Z^2\sigma_U^2}{(\beta_{RU}^2\sigma_U^2 + \sigma_R^2)(\beta_{WZ}^2\sigma_Z^2 + \sigma_W^2) + \beta_{WU}^2\sigma_U^2\sigma_R^2} \quad (2.2.5)$$

38

39 where the direct effect sizes are denoted by  $\beta_{..}$ , e.g.  $\beta_{RX}$  denotes the direct effect of  $X$  on  $R$ ,  
 40 and the variances of the errors are denoted by  $\sigma^2$ , e.g.  $\sigma_X^2$  denotes the variance of the error  
 41 of  $X$ . Formula 2.2.5 was verified by simulation (see Supplementary Material Section S4).

42

43 From Formula 2.2.5 we can see that the magnitude of the maximum bias does not depend  
 44 on  $\beta_{YX}$  and that the direction of the maximum bias depends on the sign of the product

45  $\beta_{RX}\beta_{RU}\beta_{WU}\beta_{YZ}\beta_{WZ}$  (because  $\frac{\sigma_Z^2\sigma_U^2}{(\beta_{RU}^2\sigma_U^2 + \sigma_R^2)(\beta_{WZ}^2\sigma_Z^2 + \sigma_W^2) + \beta_{WU}^2\sigma_U^2\sigma_R^2}$  is strictly positive assuming non-  
 46 zero error variances). There will be no bias if at least one of  $\beta_{RX}$ ,  $\beta_{RU}$ ,  $\beta_{WU}$ ,  $\beta_{YZ}$ , or  $\beta_{WZ}$  is  
 47 equal to zero, consistent with the underlying DAG (Figure 1).

48

49 **2.2.5. Illustration of maximum bias formula**

50 We illustrate how the maximum bias varies with the direct effect sizes using a numerical  
 51 example. In this example, we used moderate values of the direct effect sizes  $\beta_{RX}$ ,  $\beta_{RU}$ ,  $\beta_{WU}$ ,  
 52  $\beta_{YZ}$ , and  $\beta_{WZ}$  (relative to the error variances  $\sigma_U^2$ ,  $\sigma_Z^2$ ,  $\sigma_W^2$ , and  $\sigma_R^2$ , which were all equal to

1 one): direct effect sizes were each set to 0.00, 0.25, 0.50, 0.75, or 1.00. For  $\beta_{RX}$  and  $\beta_{RU}$ ,  
2 note that these values correspond approximately to odds ratios (from a logistic regression  
3 model for  $R_{ind}$ ) of 1.00, 1.50, 2.30, 3.50, or 5.30.

4  
5 Figure 3 illustrates the impact of the direct effect sizes on the maximum bias of the MI  
6 estimator. We focus particularly on the impact of  $\beta_{RX}$ ,  $\beta_{YZ}$ , and  $\beta_{WZ}$  because unbiased  
7 estimates of these effect sizes can be calculated using the observed data, assuming that  $X$ ,  
8  $W$ , and  $Z$  are fully observed and - implicit from Figure 1 - that  $\beta_{YZ|R} = \beta_{YZ}$  (note  $\beta_{RU}$  and  $\beta_{WU}$   
9 cannot be estimated in our setting because we assume  $U$  is unmeasured). In each panel,  
10 maximum bias is plotted against  $\beta_{YZ}$  and  $\beta_{WZ}$ , for a single value of  $\beta_{RX}$  (which increases  
11 across the panels). The distribution of the maximum bias for each value of  $\beta_{RX}$ ,  $\beta_{YZ}$ , and  $\beta_{WZ}$   
12 (represented as a box-plot) is due to the variation in the other two parameters; that is, each  
13 is averaged over the values of  $\beta_{RU}$  and  $\beta_{WU}$ .

14  
15 As noted previously, maximum bias is equal to zero if any of the direct effect sizes are equal  
16 to zero (hence the panel with  $\beta_{RX} = 0$  is not displayed), and increases with each of the direct  
17 effect parameters. Note that all parameters have a zero or positive value in this illustration.  
18 However, if, for example, we take the same parameter values as mentioned above for  $\beta_{RU}$ ,  
19  $\beta_{WU}$ ,  $\beta_{YZ}$ , and  $\beta_{WZ}$ , but set  $\beta_{RX}$  to negative values, then the bias would be of the same  
20 magnitude but negative.

#### 21 **2.2.6. Relative increase in precision of the MI estimator when including a collider in 22 the imputation model**

23  
24 In the setting shown in Figure 1 in which bias was maximised (*i.e.* as  $\pi_0 \rightarrow 1$ ), we also  
25 examined how the relative increase in precision of the MI estimator including  $W$  in the  
26 imputation model, compared with the CRA estimator, varied with the direct effect sizes. All  
27 direct effect sizes were set to 0.00, 0.50, or 1.00, and each variable had a mean of zero and  
28 an error variance of one. For each combination of direct effect sizes, SE of the CRA  
29 estimator was calculated algebraically using Formula 2.2.4. As above, due to the complexity  
30 of the expression for the SE of the MI estimator (Formula 2.2.2), this was calculated  
31 empirically. The relative increase in precision was calculated as  $100 \times (1 - (\text{SE of the MI}$   
32  $\text{estimator})^2 / (\text{SE of the CRA estimator})^2)$ . Results are illustrated in Supplementary Material  
33 Section S5, Figure S2. As discussed above, these show that, as  $\pi_0 \rightarrow 1$ , SE of the MI  
34 estimator including  $W$  in the imputation model can be larger or smaller than SE of the CRA  
35 estimator, depending on the magnitude of the direct effect sizes.

#### 36 **2.2.7. Bias in other settings**

37  
38 We also considered the effect of collider bias in other settings. Firstly, we considered the  
39 setting in which a continuous exposure  $X$  was partially observed and CRA and MI were, in  
40 principle, valid, with variables related as per Figure 4. In this setting (given the same  
41 assumptions and using the same MI method as in the previous setting), the theoretical  
42 magnitude of the maximum bias (when including collider  $W$  in the imputation model for  $X$ )  
43 has a more complicated form because the imputation and substantive models are not the  
44 same. Here, the imputation model is of the form:  $E(X) = \alpha_0 + \alpha_1 Y + \alpha_2 W$ , where  $E(\cdot)$  denotes  
45 the expected value. The MI estimator of  $\beta_{YX}$  will be unbiased only if an unbiased estimate of  
46 each imputation model parameter can be obtained using records with observed values of  $X$   
47 *i.e.* only if  $\alpha_0^{OBS} = \alpha_0$ ,  $\alpha_1^{OBS} = \alpha_1$ , and  $\alpha_2^{OBS} = \alpha_2$ .

48  
49 Taking  $\alpha_1$  as an example, and using a similar argument to the previous setting, the bias of  
50  $\alpha_1^{OBS}$  is bounded as follows:  $0 \leq \text{bias} \leq |\beta_{XY|W,R} - \beta_{XY|W}|$ . If there are no missing values of  
51  $X$ ,  $\alpha_1^{OBS}$  is unbiased. Bias will increase in magnitude with the probability that  $X$  is missing. In  
52 the hypothetical situation in which all values are missing, bias will take its maximum value of  
53  $|\beta_{XY|W,R} - \beta_{XY|W}|$ , where this depends on the magnitude of the conditional and marginal  
54 values of both the variance of  $Y$  and the covariance of  $X$  and  $Y$ , as well as the strength of the

1 relationship between  $W$  and missingness variable  $R$ . Specifically, the maximum bias of  $\alpha_1^{OBS}$   
2  $= \frac{A\{Var(Y)Cov(Y,X|W) - Cov(Y,X)Var(Y|W)\}}{Var(Y|W)\{Var(Y|W) - AVar(Y)\}}$ , where  $A = \frac{Cov^2(R,W)}{Var(R)Var(W)}$  (see Supplementary Material  
3 Section S6 for further details of this derivation). Similar expressions can be derived for the  
4 maximum bias of  $\alpha_0^{OBS}$  and  $\alpha_2^{OBS}$ .

5  
6 Due to its complexity in this setting, an expression for the theoretical magnitude of the  
7 maximum bias of the MI estimator is not derived here. However, we illustrate the effect on  
8 the MI estimate from including collider  $W$  in the imputation model by simulation (see  
9 Supplementary Material Section S7 for further details). Note that we refer to the MI or CRA  
10 “estimate” when describing simulation study results, rather than “estimator” (which we have  
11 used when describing algebraic results). Figure 5 illustrates the impact of the direct effect  
12 sizes on the bias of the MI estimate when  $X$  was missing for 50% of records, focusing  
13 particularly on the impact of  $\beta_{YX}$ ,  $\beta_{XZ}$ , and  $\beta_{WZ}$ . In each panel, bias is plotted against  $\beta_{XZ}$  and  
14  $\beta_{WZ}$ , for a single value of  $\beta_{YX}$  (which increases across the panels). The distribution of the  
15 bias for each value of  $\beta_{YX}$ ,  $\beta_{XZ}$ , and  $\beta_{WZ}$  (represented as a box-plot) is due to the variation in  
16 the other two parameters; that is, each is averaged over the values of  $\beta_{RU}$  and  $\beta_{WU}$ . Figure 5  
17 shows that bias is very small, regardless of the direct effect sizes. In addition, examining the  
18 relative increase in precision, compared with the CRA estimate (see Supplementary  
19 Material, Section S7, Figure S3), shows that the SE of the MI estimate including  $W$  in the  
20 imputation model can be larger or smaller than SE of the CRA estimate, depending on the  
21 magnitude of the direct effect sizes.

22  
23 In similar settings with a binary partially observed variable (*i.e.* the same settings as depicted  
24 in Figures 1 and 4 but with either partially observed binary  $Y$  or partially observed binary  $X$ ),  
25 the bias of MI estimates will be approximately the same magnitude as for the continuous  
26 cases, provided the probability of each value of the binary variable is not close to 0 or 1 (see  
27 Supplementary Material Section S7, Figures S4-5). This follows in each case by assuming  
28 that the binary variable has an underlying normal distribution, in which case the results  
29 described here will still approximately apply.

30  
31 **2.2.8. Bias when missingness of the exposure additionally depends on the outcome**  
32 In our setting with a partially observed continuous exposure  $X$ , the magnitude of bias was  
33 much smaller than in the setting with a partially observed continuous outcome  $Y$ . This is  
34 because there is only one pathway between the partially observed variable and its  
35 missingness in the  $X$  setting (via  $Z-W-U$ ), whereas there are two pathways in the  $Y$  setting  
36 (via  $Z-W-U$  and  $X$ ). Hence, the cumulative bias (*i.e.* the sum of the bias via each pathway) is  
37 potentially larger in the  $Y$  setting. Therefore, to provide a more comparable setting to that  
38 when  $Y$  is partially observed, we considered an additional setting when continuous variable  
39  $X$  was partially observed, in which  $Y$  was also a cause of missingness of  $X$  (Figure 6). The  
40 relationships depicted in Figure 6 are the same as those in Figure 4, with the addition of an  
41 arrow from  $Y$  to  $R$ . There are now two potential pathways between  $X$  and its missingness,  
42 via  $Z-W-U$  and  $Y$ . Note that CRA is no longer valid in this setting, because missingness  
43 depends on the analysis outcome  $Y$ . However, MI using  $Y$ , or  $Y$  and  $Z$ , in the imputation  
44 model for  $X$  would be valid. Using the same simulation approach as before (see  
45 Supplementary Material Section S7 for further details), Figure 7 illustrates the effect on the  
46 MI estimator from including collider  $W$  in the imputation model. Figure 7 shows that when  
47 missingness in  $X$  is caused by  $U$  and  $Y$  and  $\beta_{YX}$  is close to 0, bias is similar in magnitude to  
48 that in the setting in which missingness in  $Y$  is caused by  $U$  and  $X$ .

### 3. Real data example

#### 3.1. Methods

52 We illustrate use of our formula for maximum bias given a partially observed continuous  
53 outcome using data from the Avon Longitudinal Study of Parents and Children (ALSPAC).  
54 ALSPAC is a prospective study which recruited pregnant women with expected dates of



1 delivery between 1<sup>st</sup> April 1991 and 31<sup>st</sup> December 1992, in the Bristol area of the UK (14,  
2 15). We used data from the initial recruitment phase, in which 14,541 pregnant women  
3 enrolled, resulting in 14,062 live births (13,988 alive at one year of age). Children and their  
4 mothers have been followed up since birth through questionnaires, clinics, and linkage to  
5 routine datasets. Ethical approval for the study was obtained from the ALSPAC Ethics and  
6 Law Committee and local research ethics committees. Informed consent for the use of data  
7 collected via questionnaires and clinics was obtained from participants following the  
8 recommendations of the ALSPAC Ethics and Law Committee at the time.

9  
10 Here, our substantive model of interest was the regression of child's body mass index at age  
11 7 years (*bmi7*) on maternal education (*mated*: a binary variable indicating whether the child's  
12 mother held a post-16 years qualification). We restricted analysis to all singletons and first-  
13 born twins (excluding the second-born twin to avoid family-level clustering) who were alive at  
14 one year ( $n = 13,745$ ). For illustrative purposes, we assumed that the exposure and auxiliary  
15 variables were fully observed (in reality, a small proportion of participants had missing values  
16 for these variables: 1684 participants, 12%, were missing values of *mated*,  $n = 1510$ , *bwt*,  $n$   
17  $= 150$ , or both,  $n = 24$ ) and that there were only two candidate auxiliary variables available  
18 for use in the imputation model for *bmi7*: pregnancy size (*pregsize*: singleton vs. twin birth),  
19 and child's birth weight (*bwt*) (in reality, a large amount of individual-level data are available:  
20 the ALSPAC study website contains details of all available data through a fully searchable  
21 data dictionary and variable search tool: [http://www.bristol.ac.uk/alspac/researchers/our-](http://www.bristol.ac.uk/alspac/researchers/our-data/)  
22 [data/](http://www.bristol.ac.uk/alspac/researchers/our-data/)). Therefore, we analysed 12,061 participants with observed values of *mated*, *pregsize*,  
23 and *bwt*, of whom 7248 (60%) had an observed value of *bmi7*.

24  
25 Figure 8 depicts the relationships, based on prior research (16-19), between *bmi7*, *mated*,  
26 *pregsize*, *bwt*, and missingness indicator  $R_{ind}$  (a binary variable indicating whether *bmi7* is  
27 observed), plus unmeasured variable(s),  $U$  (related to the analysis model variables and/or  
28 their missingness e.g. markers of socio-economic position, SEP). Lines indicate related  
29 variables, with arrows indicating the direction of the relationship; absent lines represent  
30 variables with no direct causal relation. Straight, solid lines depict the relationships assumed  
31 in the theoretical scenario in which  $Y$  is MAR; curved, dashed lines depict additional  
32 relationships that are plausible in our real data example. For example, in the theoretical  
33 scenario, we assume that only  $X$  and  $Z$  cause  $Y$ , and only  $X$  and  $U$  cause missingness in  $Y$ .  
34 In the real data scenario, it is plausible that *bmi7* is MNAR, because  $U$  may be related to  
35 both *bmi7* and  $R_{ind}$ . We assume that *pregsize* is not a cause of  $R_{ind}$ , although *pregsize* may  
36 be related to  $R_{ind}$  via  $U$  (e.g. because assisted reproduction is associated with higher SEP).  
37 Similarly, we assume that *bwt* is not a cause of *bmi7* or  $R_{ind}$ , but shares a common cause  
38 with both *bmi7* and  $R_{ind}$  i.e. *bwt* is a collider.

39  
40 We assessed the potential impact on the MI estimate from including a collider (*bwt*) in the  
41 imputation model for *bmi7* in two steps:

- 42 1. We assessed whether our hypothesised relationships with *bwt* were realistic by  
43 exploring the relationships between *mated*, *pregsize*, *bwt*, and  $R_{ind}$ . We assessed  
44 relationships using linear or logistic regression models (for continuous and binary  
45 outcomes, respectively), for each pair of variables in turn (deciding which variable  
46 was the dependent variable and which the explanatory variable in any given pair  
47 according to the probable causal direction), adjusting for any observed confounders.  
48
- 49 2. Based on our results from Step 1, we applied our formula (Formula 2.2.5) for  
50 maximum bias of the MI estimator if hypothesised collider *bwt* was included in the  
51 imputation model for *bmi7*. Since not all the direct effect sizes were estimable from  
52 the observed data, we used an alternative (equivalent) version of our maximum bias  
53 formula, expressed in terms of the variances and covariances of the observed (or  
54 partially observed) variables. We also assumed (without loss of generality) that  $R$  had  
55 a mean of zero and a variance of one. Therefore, we used the following version of

1 the formula to calculate maximum bias: 
$$\frac{\text{Cov}(X,R)\text{Cov}(W,R)\text{Cov}(Y,W)}{\{\text{Var}(X)-\text{Cov}^2(X,R)\}\text{Var}(W) - \text{Var}(X)\text{Cov}^2(W,R)}$$

2  
3 where, in our setting,  $X$  denotes *mated*,  $W$  denotes *bwt*, and  $Y$  denotes *bmi7*. Since  
4 we observe  $R_{ind}$  (i.e. whether or not *bmi7* is observed) rather than the underlying  
5 normal variable  $R$ , covariance terms involving  $R$  were approximated by applying the  
6 general rule for transforming a parameter from a logistic to a probit model (20) (valid  
7 unless the proportion of complete records is very close to 0 or 1):

8  $\text{Cov}(\cdot, R) = 0.6 \times \log\text{OR}_{R_{ind}} \times \text{Var}(\cdot)$ , where  $\log\text{OR}_{R_{ind}}$  denotes the logarithm of the  
9 odds ratio (i.e. the regression parameter) from a logistic regression of  $R_{ind}$  on the  
10 specified covariate. For example,  $\text{Cov}(X, R)$  was approximated by  
11  $0.6 \times \log\text{OR}_{R_{ind}X} \times \text{Var}(X)$ . We estimated  $\text{Var}(X)$  using the normal approximation to  
12 the binomial because  $X$  was binary. We estimated  $\text{Cov}(Y, W)$  using the complete  
13 records and other terms using all records. For simplicity, we assumed that the  
14 relationship between *bwt* and *bmi7* was linear. We also assumed that estimates of  
15 the variances and covariances used in our maximum bias formula were unbiased  
16 (which may not have been the case if  $Y$  was MNAR or if there were unmeasured  
17 confounders).

18  
19 We compared our estimate of the exposure coefficient based on our formula for maximum  
20 bias to both the CRA estimate and MI estimates using no auxiliary variables or either  
21 *pregsize*, or *bwt*, or both, as auxiliary variables. Each imputation model also included the  
22 analysis model exposure, *mated*. We used a large number of imputations (100) to ensure we  
23 obtained stable estimates of the exposure coefficient and its SE.

### 24 25 **3.2. Results: magnitude of bias due to a collider auxiliary variable**

#### 26 **Step 1.**

27 Relationships between *mated*, *pregsize*, *bwt*, and  $R_{ind}$  are summarised in Table 2. In  
28 particular, these suggest that  $R_{ind}$  is strongly associated with both *mated* and *bwt*, but less so  
29 with *pregsize*. However, adjusting for *bwt* increases the strength of the relationship between  
30  $R_{ind}$  and *pregsize* (unadjusted odds ratio, OR, 1.07, 95% confidence interval, CI, 0.77 - 1.48  
31 vs. adjusted OR 1.25, 95% CI 0.90 - 1.75). These results, combined with our prior  
32 knowledge of the data, suggest that *bwt* is a collider. Therefore, inclusion of *bwt* in the  
33 imputation model for *bmi7* may induce or inflate bias due to data being MNAR.

#### 34 35 **Step 2.**

36 Substituting values based on the observed data (as per Table 2, and additionally, using  
37 estimates of  $\text{Var}(W)$ ,  $\text{Var}(X)$ , and  $\text{Cov}(Y, W)$  of 0.286, 0.228, and 0.171, respectively) into our  
38 theoretical expression, we estimated the maximum bias from including *bwt* in the imputation  
39 model for *bmi7* to be 0.008 (towards the null). This result suggests that even though there is  
40 the possibility of collider bias due to inclusion of *bwt* in the imputation model, the magnitude  
41 of bias is small in this particular setting.

42  
43 Analysis results (Table 3) confirmed that CRA and MI estimates of the exposure coefficient  
44 were very similar, regardless of the auxiliary variable(s) used in the MI procedure. However,  
45 as predicted, there was slight attenuation in the MI estimate when *bwt* was included in the  
46 imputation model for *bmi7*. This was the case even when *pregsize* was also included. This  
47 suggests that there was at least one other unobserved variable that had similar relationships  
48 with other variables as *pregsize* (e.g. child sex), so adjusting for *pregsize* did not completely  
49 remove the bias induced by inclusion of *bwt* in the imputation model. The difference between  
50 the CRA estimate and the MI estimate including *bwt* was 0.023 (towards the null), which was  
51 larger than our estimate based on the theoretical magnitude of bias, although in the same  
52 direction.

53

1 As expected, the SE of the CRA estimate was similar to the SE of the MI estimate using no  
2 auxiliary variables and larger than the SE for MI estimates using *pregsize* or *bwt* as auxiliary  
3 variables. However, the SE of the MI estimate using both *pregsize* and *bwt* as auxiliary  
4 variables was larger than for all other analysis strategies. This may be because *pregsize* has  
5 only a weak direct effect on *bmi7*, *i.e.* *pregsize* is largely redundant if the imputation model  
6 already includes *bwt*; thus its addition leads to a decrease in precision (4).  
7

#### 8 **4. Discussion**

9 In this paper, we quantify, algebraically and by simulation, the magnitude of bias and SE of  
10 the MI estimator induced by including a collider in the imputation model, in settings where it  
11 is possible to specify an imputation model that gives unbiased inference for the population  
12 parameter values. We have derived an algebraic expression for the maximum bias and its  
13 relationship to the proportion of incomplete records when a continuous outcome is partially  
14 observed. We have demonstrated that in this setting (and also if the outcome is binary), the  
15 bias can be substantial, relative to the magnitude of the exposure coefficient. We found, in  
16 settings in which CRA was valid, the bias due to inclusion of a collider in the imputation  
17 model was smaller when the exposure in the analysis model (either binary or continuous)  
18 was partially observed. However, bias was larger in magnitude if the outcome also caused  
19 missingness in the exposure (in which case CRA was no longer valid but MI, using a  
20 correctly specified imputation model and correct choice of auxiliary variables, was valid).  
21

22 When the outcome is partially observed, we have shown that the magnitude of the bias of  
23 the MI estimator from including a collider in the imputation model depends on the magnitude  
24 of the associations between the exposure and missingness, between the collider and  
25 missingness, and between the collider and the outcome, as well as on the proportion of  
26 missing data. Crucially, it does not depend on the magnitude of the association between  
27 outcome and exposure. Therefore, if the association between outcome and exposure is  
28 much weaker than the associations between other pairs of variables and the proportion of  
29 incomplete records is fairly large (precisely the situation in which one may wish to use  
30 auxiliary variables), the relative bias of the MI estimator could be substantial. In addition,  
31 since the direction of bias depends on the signs of the associations between other pairs of  
32 variables (and not on the sign of the association between outcome and exposure), it is  
33 possible, for example, that this could bias the estimator to the extent that a weak positive  
34 association is incorrectly estimated as a stronger negative association.  
35

36 In our real data example, we assumed that both auxiliary variables (direct predictor  
37 pregnancy size and collider birth weight) were measured. However, note that the bias can  
38 still be estimated even if the direct predictor is unmeasured, because the maximum bias  
39 formula does not depend on this variable. However, in this case, assessing whether an  
40 auxiliary variable is a collider may need to rely on both prior knowledge and inspection of the  
41 hypothetical causal model of interest, because it may be difficult to assess whether it is a  
42 collider using the observed data alone. The likely impact of including a collider in the  
43 imputation model(s) can still be assessed using our suggested formula and/or our plots  
44 based on simulations, estimating the strength of each relevant association using either the  
45 observed data or published results.  
46

47 In addition to inducing bias, including a collider in the imputation model may increase, rather  
48 than decrease, the SE of the MI estimator. We have shown that this depends on the  
49 magnitude of the associations between the exposure, outcome, collider, and missingness.  
50 However, inclusion of a collider in the imputation model may recover more information about  
51 the missing data than CRA, or MI including only the other analysis model variables in the  
52 imputation model, and increase precision. Therefore, where the likely bias from inclusion of a  
53 collider is sufficiently small, we recommend performing a sensitivity analysis, comparing the  
54 precision of the MI estimate when the imputation model does or does not include a collider. If  
55 the gain in precision is sufficiently large, it may be preferable to include a collider in the

1 imputation model, at the expense of some bias, especially if no other auxiliary variables are  
2 available.

3

4 A strength of our approach is that we have considered a range of scenarios, in which the  
5 partially observed variable is either the analysis model outcome or the exposure, as well as  
6 either continuous or binary. By using both algebraic quantification and simulation, we have  
7 been able to provide a detailed illustration of the effect on both bias and SE, and how these  
8 are related to the magnitude and sign of individual associations between exposure, outcome,  
9 auxiliary variables, and missingness. A limitation of our study is that in each of our scenarios,  
10 only a single variable has missing values. When multiple variables have missing values,  
11 assessing whether imputation models include colliders is likely to be a more complex  
12 process. However, we would expect our findings to extend to these situations.

13

14 In summary, we conclude that, although auxiliary variables have the potential to improve  
15 precision of the MI estimate and reduce bias compared with an imputation model that only  
16 includes analysis model variables, poorly-chosen auxiliary variables can increase both bias  
17 and SE. Therefore, it is important that auxiliary variables are selected carefully. In particular,  
18 we recommend examining whether any potential auxiliary variables are colliders. This can  
19 be achieved through a combination of data exploration and consideration of the plausible  
20 casual diagrams and missingness mechanisms (e.g. by using a missingness DAG (21, 22)).

## Tables

Table 1. Missing data definitions

| Term                                | Definition                                                                                                                                                                                                                                                                                                                                                                                                                                                                                                                                                                                                                                                                                           |
|-------------------------------------|------------------------------------------------------------------------------------------------------------------------------------------------------------------------------------------------------------------------------------------------------------------------------------------------------------------------------------------------------------------------------------------------------------------------------------------------------------------------------------------------------------------------------------------------------------------------------------------------------------------------------------------------------------------------------------------------------|
| Complete Records Analysis (CRA)     | Analysis is restricted to subjects who have complete data for all variables in the analysis model.                                                                                                                                                                                                                                                                                                                                                                                                                                                                                                                                                                                                   |
| Missing Completely At Random (MCAR) | The probability that data are missing is independent of the observed and missing values of variables in the analysis model, and of any related variables. Data can be MCAR if missingness is caused by a variable independent of all these e.g. if missingness is for administrative reasons.                                                                                                                                                                                                                                                                                                                                                                                                        |
| Missing At Random (MAR)             | Given the observed data, the probability that data are missing is independent of the true values of the incomplete variable. Any systematic differences between the observed and missing values can be explained by associations with the observed data.                                                                                                                                                                                                                                                                                                                                                                                                                                             |
| Missing Not At Random (MNAR)        | If data are not MCAR nor MAR, data are said to be MNAR. The probability that data are missing depends on the (unobserved) values of the incomplete variable, even after conditioning on the observed data.                                                                                                                                                                                                                                                                                                                                                                                                                                                                                           |
| Multiple Imputation (MI)            | MI is a method for handling missing data. It consists of three steps: <ol style="list-style-type: none"> <li>1. An imputation model is fitted to the observed data (this is usually some form of regression model). The missing values are replaced with draws (“imputed”) from their conditional predictive distribution (after first perturbing the model parameters). This imputation stage is carried out multiple (M) times, to give M completed datasets.</li> <li>2. The analysis model is fitted to each of the M completed datasets.</li> <li>3. The M sets of results are combined using Rubin’s rules, (23) to correctly account for the uncertainty about the missing values.</li> </ol> |
| Auxiliary variable                  | A variable that is not in the analysis model but that is included as a predictor in the imputation model to recover information about the missing data.                                                                                                                                                                                                                                                                                                                                                                                                                                                                                                                                              |

Table 2. Relationships between maternal education (*mated*), pregnancy size (*pregsize*), child's birth weight (*bwt*), and whether child's body mass index (BMI) was observed at age 7 years (*R<sub>ind</sub>*), determined using linear or logistic regression models (for continuous and binary outcomes, respectively).

|                      |                        | Dependent variable                                                                                    |                                                                                             |                                                                                                                                                                                                              |
|----------------------|------------------------|-------------------------------------------------------------------------------------------------------|---------------------------------------------------------------------------------------------|--------------------------------------------------------------------------------------------------------------------------------------------------------------------------------------------------------------|
|                      |                        | <i>pregsize</i>                                                                                       | <i>bwt</i>                                                                                  | <i>R<sub>ind</sub></i>                                                                                                                                                                                       |
| Explanatory variable | <i>mated</i>           | Odds of twin birth is slightly reduced when mother holds a post-16 qual. (OR 0.96, 95% CI 0.69, 1.34) | Mean birth weight increases by 0.05kg (95% CI 0.03, 0.07) when mother holds a post-16 qual. | Odds of observed BMI at 7y is twice as great when mother holds a post-16 qual. (OR 2.31, 95% CI 2.13, 2.51)                                                                                                  |
|                      | <i>pregsize</i>        |                                                                                                       | Mean birth weight decreases by 0.91kg (95% CI 0.82, 0.99) for twin birth (vs. singleton)    | Odds of observed BMI at 7y is slightly greater for a twin birth (vs. singleton) (OR 1.07, 95% CI 0.77, 1.48). <b>Conditional on birth weight, relationship appears stronger (OR 1.25, 95% CI 0.90, 1.75)</b> |
|                      | <i>bwt</i>             |                                                                                                       |                                                                                             | Conditional on maternal education, odds of observed BMI at 7y increases for each kg increase in birth weight (OR 1.15, 95% CI 1.07, 1.23)                                                                    |
|                      | Unmeasured variable(s) | Possibly related – cannot be assessed using the observed data                                         |                                                                                             |                                                                                                                                                                                                              |

BMI, body mass index; OR, odds ratio; CI, confidence interval.

For each cell, the row indicates the explanatory variable and the column indicates the dependent variable of the regression model.

All parameter values are estimates based on the full data, and are conditional on any observed confounders.

Relationships opposite to the probable direction of causality were not assessed.

We assume that maternal education is not caused by any other observed variable, and that whether BMI is observed at age 7 years is not a cause of any other variable.

We note that, in addition to the observed relationships depicted, each observed variable may be related to other, unmeasured variable(s).

*Table 3. Mean change in child's body mass index (kg/m<sup>2</sup>) at age 7 years when mother holds a post-16 qualification (vs. no post-16 qualification), estimated using different analysis strategies*

| <b>Analysis strategy</b>                                               | <b>Estimate (SE)</b> | <b>95% CI</b>  |
|------------------------------------------------------------------------|----------------------|----------------|
| Complete records analysis                                              | -0.108 (0.049)       | -0.203, -0.013 |
| MI with no auxiliary variables                                         | -0.106 (0.049)       | -0.209, -0.011 |
| MI with pregnancy size as auxiliary variable                           | -0.107 (0.047)       | -0.198, -0.015 |
| MI with child's birth weight as auxiliary variable                     | -0.085 (0.047)       | -0.176, 0.007  |
| MI with pregnancy size and child's birth weight as auxiliary variables | -0.091 (0.050)       | -0.189, 0.006  |

SE, standard error; CI, confidence interval.

## Figures

Figure 1. Directed acyclic graph depicting the relationship between outcome  $Y$ , exposure  $X$ , missingness indicator  $R_{ind}$ , and potential auxiliary variables  $Z$ ,  $W$ , and  $U$ . Lines indicate related variables, with arrows indicating the direction of the relationship; absent lines represent variables with no direct causal relation.

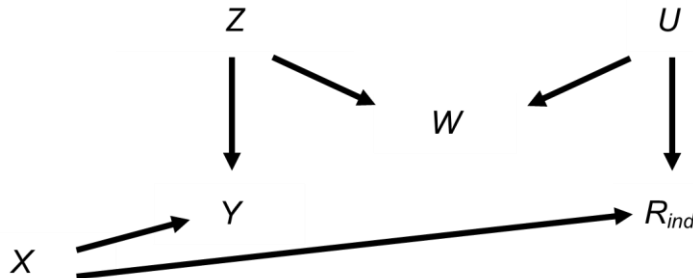

Figure 2. (a) Estimated bias and (b) standard error (SE) of the MI estimator of  $\beta_{YX}$  when the imputation model includes a collider,  $W$ , and SE of the complete records analysis (CRA) estimator of  $\beta_{YX}$ , plotted against the proportion of records with missing data, when continuous outcome  $Y$  is partially observed, assuming 1000 observed values. All direct effect sizes and error variances equal one. Horizontal grey solid lines represent the values of bias and SE of the MI estimator when the proportion of records with missing data is zero (lower line) or tends to one (upper line). Horizontal grey dashed lines represent the values of SE of the CRA estimator when the proportion of records with missing data is zero (lower line) or tends to one (upper line).

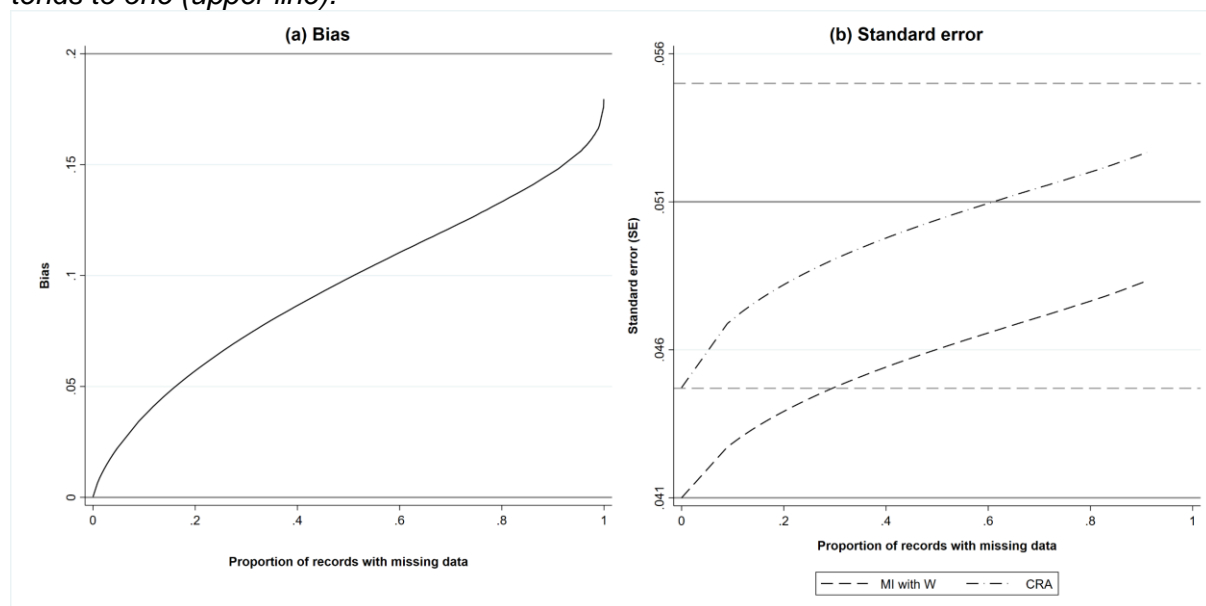



Figure 3. Maximum bias of the MI estimator of  $\beta_{YX}$  when continuous outcome  $Y$  is partially observed, varying direct effect sizes  $\beta_{RX}$ ,  $\beta_{RU}$ ,  $\beta_{WU}$ ,  $\beta_{YZ}$ , and  $\beta_{WZ}$ . The distribution of maximum bias in each box-plot is averaged over the values of  $\beta_{RU}$  and  $\beta_{WU}$ .

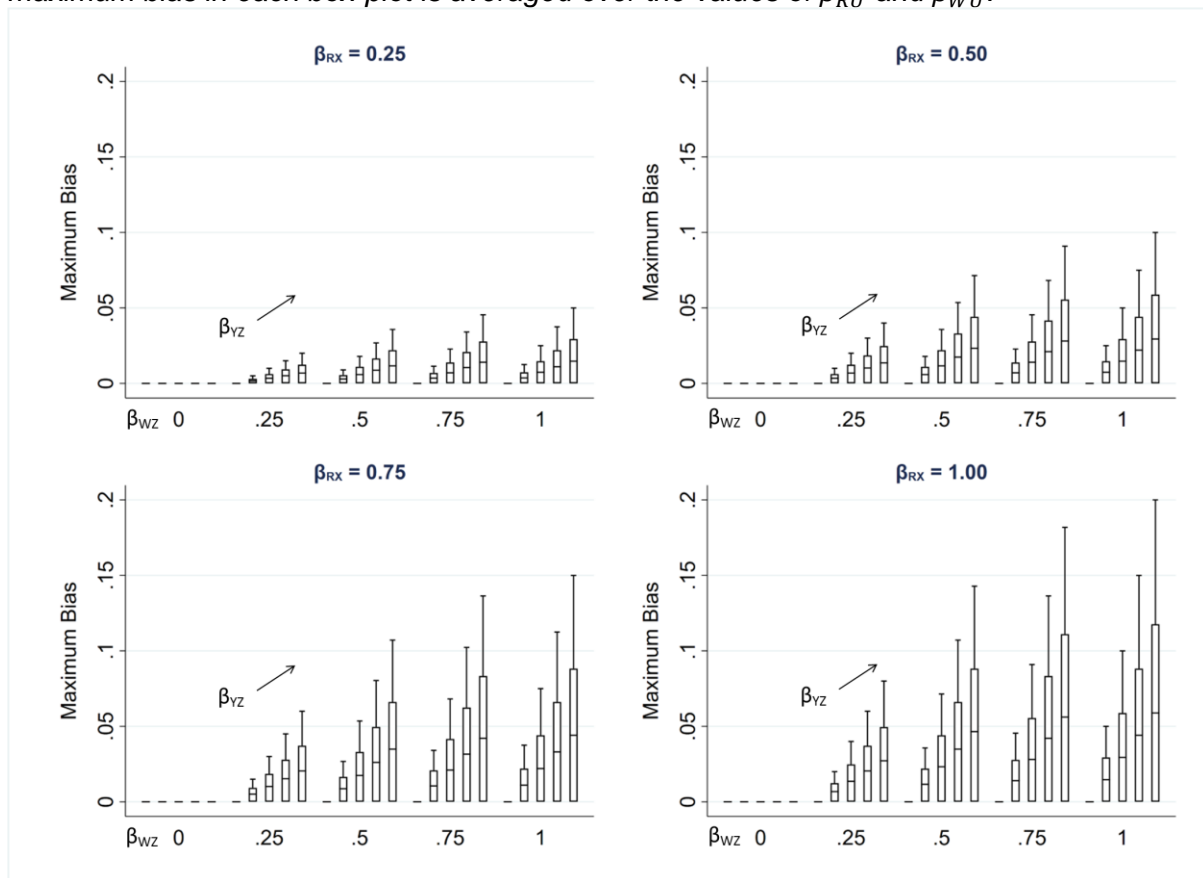

Figure 4. Directed acyclic graph depicting the relationship between outcome  $Y$ , exposure  $X$ , missingness indicator  $R_{ind}$ , and potential auxiliary variables  $Z$ ,  $W$ , and  $U$ . Lines indicate related variables, with arrows indicating the direction of the relationship; absent lines represent variables with no direct causal relation.

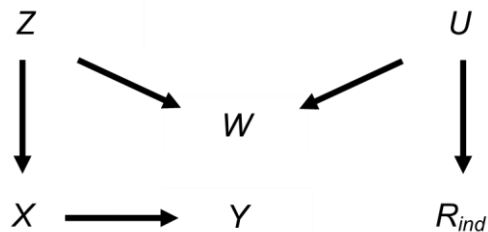

Figure 5. Bias of the MI estimate of  $\beta_{YX}$  when 50% of values of a continuous exposure  $X$  are missing, varying direct effect sizes  $\beta_{YX}$ ,  $\beta_{XZ}$ ,  $\beta_{WZ}$ ,  $\beta_{RU}$ , and  $\beta_{WU}$ . The distribution of bias in each box-plot is averaged over the values of  $\beta_{RU}$  and  $\beta_{WU}$ .

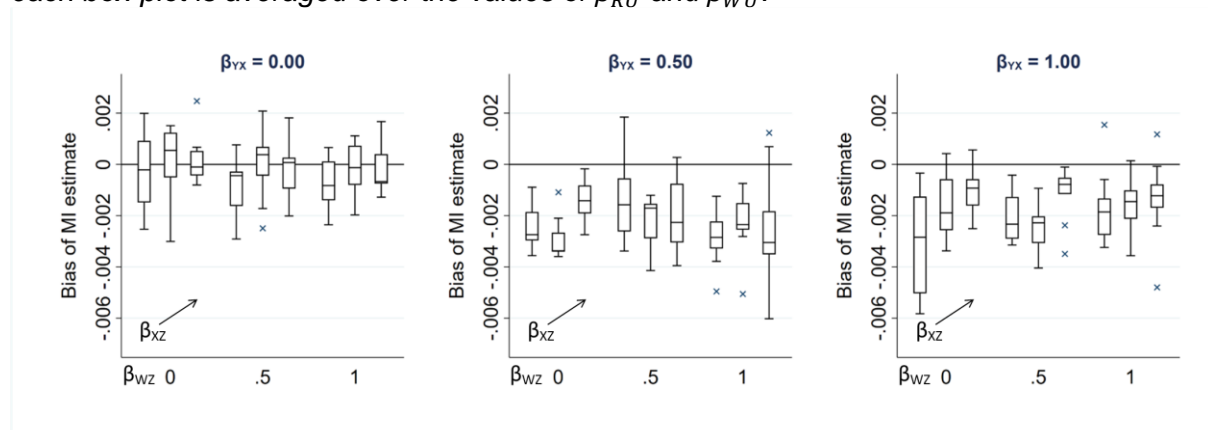

Figure 6. Directed acyclic graph depicting the relationship between outcome  $Y$ , exposure  $X$ , missingness indicator  $R_{ind}$ , and potential auxiliary variables  $Z$ ,  $W$ , and  $U$ . Lines indicate related variables, with arrows indicating the direction of the relationship; absent lines represent variables with no direct causal relation.

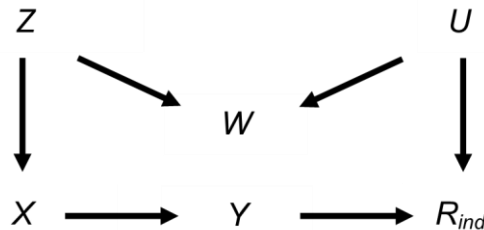

Figure 7. Bias of the MI estimate of  $\beta_{YX}$  when 50% of values of a continuous exposure  $X$  are missing, varying direct effect sizes  $\beta_{YX}$ ,  $\beta_{XZ}$ ,  $\beta_{WZ}$ ,  $\beta_{RU}$ , and  $\beta_{WU}$ . The distribution of bias in each box-plot is averaged over the values of  $\beta_{RU}$  and  $\beta_{WU}$ .

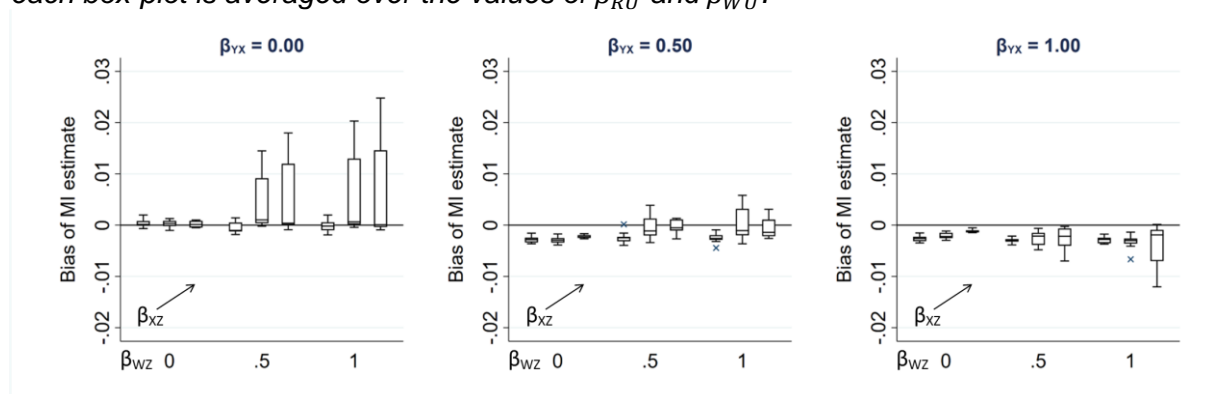

Figure 8. Directed acyclic graph depicting the relationship between child's body mass index at age 7 years ( $bmi7$ ), maternal education ( $mated$ : a binary variable indicating whether the child's mother held a post-16 years qualification), pregnancy size ( $pregsize$ : singleton or twin birth), child's birth weight ( $bwt$ ), missingness indicator  $R_{ind}$  (a binary variable indicating whether  $bmi7$  is observed), and unobserved variable(s)  $U$ . Lines indicate related variables, with arrows indicating the direction of the relationship. Straight solid lines depict the relationships assumed in the theoretical scenario in which the analysis model outcome is missing at random; curved dashed lines depict additional relationships that are plausible in our real data example; absent lines represent variables with no direct causal relation.

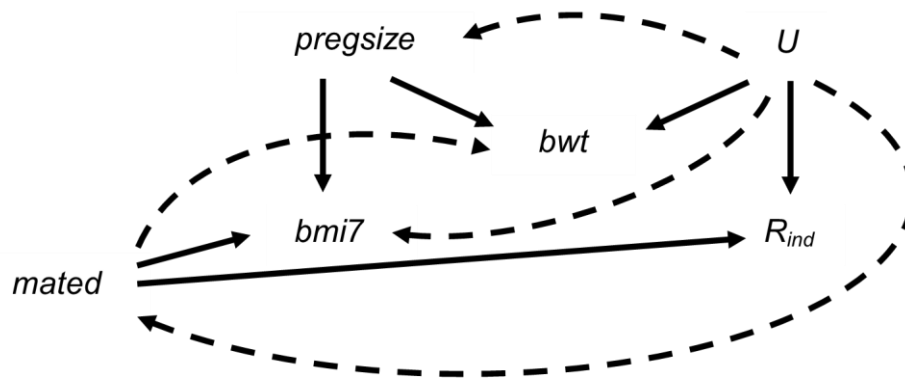

## References

1. Carpenter JR, Smuk M. Missing data: A statistical framework for practice. *Biom J*. 2021;63(5):915-47.
2. Collins LM, Schafer JL, Kam C-M. A Comparison of Inclusive and Restrictive Strategies in Modern Missing Data Procedures. *Psychol Methods*. 2001;6(4):330-51.
3. Cornish R, Macleod J, Carpenter J, Tilling K. Multiple imputation using linked proxy outcome data resulted in important bias reduction and efficiency gains: A simulation study. *Emerging Themes in Epidemiology*. 2017;14(14):1-13.
4. Carpenter J, Kenward M. The Multiple Imputation Procedure and its Justification. *Multiple Imputation and its Application*. Chichester, UK: Wiley; 2013. p. 37-73.
5. Greenland S, Pearl J, Robins JM. Causal Diagrams for Epidemiologic Research. *Epidemiology*. 1999;10(1):37-48.
6. Thoemmes F, Rose N. A Cautious Note on Auxiliary Variables That Can Increase Bias in Missing Data Problems. *Multivariate Behavioral Research*. 2014;49(5):443-59.
7. Hughes R, Heron J, Sterne J, Tilling K. Accounting for missing data in statistical analyses: multiple imputation is not always the answer. *Int J Epidemiol*. 2019:1-11.
8. Little RJA. Regression With Missing X's: A Review. *Journal of the American Statistical Association*. 1992;87(420):1227-37.
9. Greenland S. Quantifying Biases in Causal Models: Classical Confounding vs Collider-Stratification Bias. *Epidemiology*. 2003;14(3):300-6.
10. StataCorp. *Stata17: Multiple-Imputation Reference Manual*. College Station, TX, USA: Stata Press; 2021.
11. SAS Institute. *The SAS system for Windows. Version 9.2*. Cary, NC, 2011.
12. Morris TP, White IR, Royston P. Tuning multiple imputation by predictive mean matching and local residual draws. *BMC Medical Research Methodology* 2014;14(75).
13. Van Buuren S, Groothuis-Oudshoorn K. mice: Multivariate Imputation by Chained Equations in R. *Journal of Statistical Software*. 2011;45(3):1-67.
14. Boyd A, Golding J, Macleod J, Lawlor DA, Fraser A, Henderson J, et al. Cohort Profile: The 'Children of the 90s'; the index offspring of the Avon Longitudinal Study of Parents and Children (ALSPAC). *Int J Epidemiol*. 2013;42(1):111-27.
15. Fraser A, Macdonald-Wallis C, Tilling K, Boyd A, Golding J, Davey Smith G, et al. Cohort Profile: The Avon Longitudinal Study of Parents and Children: ALSPAC mothers cohort. *Int J Epidemiol*. 2013;42:97-110.
16. Cribb VL, Jones LR, Rogers IS, Ness AR, Emmett PM. Is maternal education level associated with diet in 10-year-old children? *Public Health Nutr*. 2011;14(11):2037-48.
17. Matijasevich A, Victora CG, Golding J, Barros FC, Menezes AM, Araujo CL, et al. Socioeconomic position and overweight among adolescents: data from birth cohort studies in Brazil and the UK. *BMC Public Health*. 2009;9(1):105.
18. Cornish RP, Macleod J, Boyd A, Tilling K. Factors associated with participation over time in the Avon Longitudinal Study of Parents and Children: a study using linked education and primary care data. *Int J Epidemiol*. 2021;50(1):293-302.
19. Simpson J, Smith ADAC, Fraser A, Sattar N, Lindsay RS, Ring SM, et al. Programming of Adiposity in Childhood and Adolescence: Associations With Birth Weight and Cord Blood Adipokines. *J Clin Endocrinol Metab*. 2017;102(2):499-506.
20. Gelman A, Hill J. *Data Analysis Using Regression and Multilevel/Hierarchical Models*. New York, USA: Cambridge University Press; 2006.
21. Daniel RM, Kenward MG, Cousens SN, Stavola BLD. Using causal diagrams to guide analysis in missing data problems. *Stat Methods Med Res*. 2012;21(3):243-56.
22. Lee KJ, Carlin JB, Simpson JA, Moreno-Betancur M. Assumptions and analysis planning in studies with missing data in multiple variables: moving beyond the MCAR/MAR/MNAR classification. *Int J Epidemiol*. 2023.
23. Rubin DB. *Multiple imputation for nonresponse in surveys*. New York: Wiley; 1987.
